STUDY PROTOCOL

# Informing a governance model for integration of community pharmacists and family physicians and nurse practitioner-led practices and teams within Ontario Health Teams: A protocol

Monica Aggarwal<sup>1,2\*</sup>, Lisa Dolovich<sup>3</sup>, Yazid Al Hamarneh<sup>4</sup>, Kristina M. Kokorelias<sup>5,6,7</sup>, Reed Beall<sup>8,9</sup>, Ross Upshur<sup>1,2</sup>

**1** Dalla Lana School of Public Health, University of Toronto, Toronto, Ontario, Canada, **2** Department of Family and Community Medicine, University of Toronto, Toronto, Ontario, Canada, **3** Leslie Dan Faculty of Pharmacy, University of Toronto, Toronto, Ontario, Canada, **4** Department of Pharmacology, University of Alberta, Edmonton, Alberta, Canada, **5** Section of Geriatrics, Department of Medicine, Sinai Health and University Health Network, Toronto, Ontario, Canada, **6** Department of Occupational Sciences and Occupational Therapy, University of Toronto, Toronto, Ontario, Canada, **7** Rehabilitation Sciences Institute, University of Toronto, Toronto, Ontario, Canada, **8** Department of Community and Health Sciences, University of Calgary, Calgary, Alberta, Canada, **9** O'Brien Institute for Public Health, University of Calgary, Calgary, Alberta, Canada

\* [monica.aggarwal@utoronto.ca](mailto:monica.aggarwal@utoronto.ca)

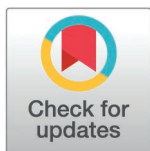

## OPEN ACCESS

**Citation:** Aggarwal M, Dolovich L, Al Hamarneh Y, Kokorelias KM, Beall R, Upshur R (2025) Informing a governance model for integration of community pharmacists and family physicians and nurse practitioner-led practices and teams within Ontario Health Teams: A protocol. PLoS One 20(6): e0325270. <https://doi.org/10.1371/journal.pone.0325270>

**Editor:** Jenny Wilkinson, Endeavour College of Natural Health, AUSTRALIA

**Received:** September 18, 2024

**Accepted:** May 8, 2025

**Published:** June 17, 2025

**Copyright:** © 2025 Aggarwal et al. This is an open access article distributed under the terms of the [Creative Commons Attribution License](https://creativecommons.org/licenses/by/4.0/), which permits unrestricted use, distribution, and reproduction in any medium, provided the original author and source are credited.

**Data availability statement:** No datasets were generated or analyzed in the current protocol. Availability and access to data upon study completion will be in accordance with the

## Abstract

### Background

The expansion of the scope of practice for community pharmacists has the potential to improve timely access to primary care. However, overlapping scopes of practice with family physicians (FPs) and nurse practitioners (NPs) have the potential for duplication of services or fragmented care. To optimize the benefits of this change, clear integrated governance mechanisms are needed to define roles, responsibilities, and accountabilities between providers. To date, there is no research on integrated governance models for independent primary care provider organizations.

### Objective

To develop a governance model that will enable better integration of community pharmacists with FPs and NPs within Ontario Health Teams.

### Methods

A multi-method study design will be used. A literature review will be conducted to identify innovative programs and policies between community pharmacies, FPs, and NPs. Then, relevant stakeholders will be identified and engaged in key informant interviews to exchange knowledge, identify priorities, and co-create policy and governance strategies.

guidelines of the University of Toronto Health Sciences Research Ethics Board guidelines.

**Funding:** This work is supported by the New Initiative and Innovation Award (NIIA), Leslie Dan Faculty of Pharmacy and the Dalla Lana School of Public Health, University of Toronto (#208782).

**Competing interests:** The authors have declared that no competing interests exist.

**Abbreviations:** FP, family physician; IFIC, International Foundation for Integrated Care; NP, nurse practitioner; OHT, Ontario Health Team; PC, primary care; RACI, responsible, accountable, consulted, informed.

## Results

The scoping review will identify existing models, gaps, and governance approaches that support or hinder integration. Interviews will explore stakeholder experiences related to integrated governance. A conceptual integrated governance model will be developed based on these findings.

## Discussion

This initiative aligns with the broader mission of improving healthcare services and outcomes in Ontario by establishing a governance model that enables better integration between community pharmacists, FPs, and NPs. This research will support policy and practice innovations to strengthen integrated delivery in Ontario and beyond.

## Introduction

Pharmacists play an integral role in the primary care (PC) system. We define PC “as an inclusive term to cover the spectrum of first contact healthcare models from those whose focus is comprehensive, person-centred care, sustained over time, to those that also incorporate health promotion towards community development and intersectoral action to address the social determinants of health” [1]. Pharmacists deliver PC services [2–4] and frequently see patients in the community, more often than other healthcare providers [5]. Pharmacists are trained to provide a wide range of services, including: prescribing medications, ordering lab tests, providing injections for vaccines and other injectable products, delivering patient education on lifestyle and drug usage, overseeing the dispensing of medications, monitoring actual or potential drug effectiveness, harms, or interactions, and offering expertise on pharmaceuticals’ proper use and effects [6]. Pharmacists have varying scopes across Canadian jurisdictions and work in various settings, including community, hospital, and as part of interdisciplinary PC teams [7]. Pharmacists, in any of the aforementioned settings, work collaboratively with other professionals and have demonstrated to improve patient care and outcomes [7].

As of January 1, 2023, the Ontario government granted pharmacists prescribing authority for 13 minor (common) ailments [8]. On October 1, 2023, pharmacists gained prescribing authority for six additional conditions, bringing the total to 19 [9]. These legislative changes align with developments in other provinces (Newfoundland, New Brunswick, and Alberta) [9] and countries (New Zealand, the United Kingdom, and the United States) [10] that have expanded the scope of practice for pharmacists autonomously or in collaboration with other healthcare providers to prescribe and renew medications. This expansion is reshaping PC by enabling pharmacists to deliver services traditionally provided by family physicians (FPs) or nurse practitioners (NPs) (e.g., prescribing medications, adjusting dosages, administering vaccinations, managing chronic conditions [e.g., diabetes, hypertension]) [11,12]. In underserved areas, pharmacists’ expanded prescribing authority could alleviate gaps in healthcare access, offering timely care for patients who might otherwise face

long wait times or travel significant distances [7,12]. However, in more well-served areas with strong provider networks, the impact may be more modest and could potentially divert attention and resources from strengthening PC services in underserved regions.

Nevertheless, these reforms represent a promising step toward broader pharmacist integration in PC [13]. Several models now embed pharmacists in physician or NP-led interprofessional PC teams [14–19]. Meanwhile, community pharmacists are working in independently owned pharmacies, banner, chain pharmacy corporations and other types of pharmacies [20], where patients can be assessed and treated for injuries and common ailments such as urinary tract infections and pink eye [21] and receive care for diabetes, hypertension, and asthma with or without needing an appointment [21]. In some models, the NP is part of the team, while in others, pharmacists provide PC services within their autonomous community pharmacy setting [22,23]. For example, in Nova Scotia, pharmacists in Community Pharmacy Primary Care Clinics are responsible for addressing 31 minor ailments and prescribing and monitoring medications for common chronic conditions such as diabetes [24].

The integration of community pharmacists into the PC system can optimize overall healthcare delivery and patient health in the community [25]. Integration can be defined as “a coherent set of methods and models on the funding, administrative, organizational, service delivery and clinical levels designed to create connectivity, alignment and collaboration within and between the cure and care sectors” [26]. Since community pharmacists, FPs, and NPs increasingly share scopes of practice—and sometimes the same patients—integration between providers and organizations will be crucial to avoid fragmented care. Effective integration can improve processes (e.g., appropriate medication use, better hypertension control, increased medication consultations, enhanced prescribing practices) and outcomes (reduced healthcare utilization and medication costs, and better management of chronic conditions) [7]. The outcome of successful integration processes within the clinical setting can be termed integrated care, [26] which is operationalized in this paper as different health services embedded in a single unified system with shared governance and processes [27–29]. Integrated care models exist on a spectrum, ranging from simple communication between providers to fully integrated interprofessional teams [30].

Establishing effective governance models to foster integrated care is essential for defining the roles and authority of key stakeholders (e.g., FPs, NPs, PC teams, or organizations, and community pharmacists), establishing mechanisms for resolving conflicts, making strategic decisions, maintaining compliance with legal and ethical standards; and ensuring there is accountability, transparency, and effective use of resources [31]. Governance is defined as a combination of structures, policies, and processes encompassing legal agreements and addressing shared and sole risks where applicable [32] to ensure that a designated governance body delivers value to shareholders [33]. Decision-making, resource allocation, and responsibilities can be shared, emphasizing inclusivity, cooperation, and consensus-based decisions. Research shows that well-structured governance mechanisms can enhance role clarity, trust, communication, and problem-solving and minimize conflicts, ultimately leading to more successful integrations with outcomes (e.g., improved service delivery, innovation, and sustained relationships between the involved organizations) [34]. However, challenges may arise from power imbalances among stakeholders, conflicting interests, and differing organizational cultures, which can impede effective integration [34,35].

Successful integration is defined as the development of a well-functioning and integrated working partnership between community pharmacists and FPs and NPs [36–39]. Although there is a substantial amount of literature on collaboration between FPs and pharmacists in the context of those formally affiliated/connected with a PC practice or team [40], there is less known about governance models [41] that formally establish the roles and responsibilities within a health system for integrated care delivered by community pharmacy teams (e.g., teams that encompass pharmacists, pharmacy technicians and pharmacy assistants) who are working in independent, often/mainly privately owned organizations and FP and NP-led practices and teams. The development of governance mechanisms for effective integration between community pharmacists and FP and NP-led practices or teams within the health care system will be pivotal to advancing coordinated, effective, accessible, and quality care to Ontarians.

This proposal aims to generate evidence to inform the development of a governance model to enable better integration between community pharmacists and FP and NP-led practices or teams within Ontario Health Teams (OHTs). OHTs are collaborative networks of healthcare providers and organizations working together to deliver a continuum of care to a defined population, from primary, acute, long-term, and home care to social and community services. OHTs are designed to streamline patient transitions between providers, improve care integration, and share resources under a single accountability framework [42,43]. OHTs provide an opportune setting for implementing the proposed integrated governance model, as they are designed to enhance collaboration across healthcare sectors and facilitate interdisciplinary coordination.

## Methods

### Design

A multi-methods study design, informed by other PC studies, is proposed for this study. This study will be theoretically informed by two frameworks: the RACI Matrix (Responsible, Accountable, Consulted, Informed) and the Nine Pillars of Integrated Care. The RACI matrix is a responsibility assignment tool that clarifies roles in a task or project, helping to streamline decision-making by defining who is responsible, who has authority, and who should be consulted or informed [44,45].

The International Foundation for Integrated Care (IFIC) developed the Nine Pillars of Integrated Care as foundational principles for enhancing population health and well-being through collaborative systems [46]. These include: (1) establishing shared values and vision; (2) adopting a population health approach that addresses root causes and social determinants; (3) engaging people as active partners in their health and care; (4) fostering resilient communities and new alliances; (5) developing workforce capacity and capability; (6) implementing system-wide governance and leadership; (7) leveraging digital solutions; (8) aligning payment systems; and (9) ensuring transparency of progress, results, and impact [46]. Together, these principles underscore the significance of person-centred, collaborative approaches that transcend traditional healthcare boundaries, emphasizing community empowerment, digital innovation, and value-based care models [46].

The RACI matrix and the Nine Pillars of Integrated Care share a common focus on enhancing clarity, accountability, and collaboration in healthcare management. To illustrate this alignment, we created a figure (Fig 1) mapping the components of the RACI matrix—defining roles as Responsible, Accountable, Consulted, and Informed—to the Pillars' emphasis on system-wide governance and leadership (Pillar 6), which calls for clear delineation of roles and responsibilities within integrated care systems [44,46]. This figure was developed based on our understanding of the core principles and applications of both frameworks [44,46], informed by existing literature on the different stakeholders involved in healthcare decision-making [47–49] (i.e., A=Accountability aligns the “System-wide Governance and Leadership” pillar with the Board of Directors as “Accountable” and healthcare leaders as “Consulted” to reflect established governance practices in healthcare organizations) [50]. This figure is, therefore, grounded in the researchers' knowledge of the literature. It will be further validated and refined through this research to ensure its accuracy and utility.

To meet our objectives, we will conduct a structured literature review on programs between community pharmacy practices or teams (pharmacists, which may also include pharmacy technicians or pharmacy assistants) and FP and NP-led practices and teams. Subsequently, interviews with key stakeholders from these sectors will guide governance strategies for integrated models, focusing on roles, responsibilities, accountabilities, and legal frameworks.

### Phase 1: Literature review

We will conduct a structured literature review informed by the Joanna Briggs Institute [51] methods to identify and analyze best practice programs or innovations involving community pharmacists and FPs and NPs. This review will follow the

|                                               | R= Responsible                                      | A= Accountable                                | C= Consulted                                                       | I= Informed                                |
|-----------------------------------------------|-----------------------------------------------------|-----------------------------------------------|--------------------------------------------------------------------|--------------------------------------------|
| Nine Pillars of Integrated Care               | R                                                   | A                                             | C                                                                  | I                                          |
| Shared Values and Vision                      | Leadership Teams, Strategic Planners                | Executive Management                          | All Stakeholders, Including Patients and Community Representatives | All Staff, Patients, and Community Members |
| Population Health and Local Context           | Public Health Officials, Local Healthcare Providers | Regional Health Authority                     | Community Leaders, Population Health Experts                       | Local Government, General Public           |
| People as Partners in Care                    | Care Coordinators, Patient Advocates                | Healthcare Providers, Patient Advisory Boards | Patients, Families, and Caregivers                                 | All Care Team Members, Patients            |
| Resilient Communities and New Alliances       | Community Health Workers, Social Workers            | Community Health Organizations                | Local Non-profits, Community Groups                                | Residents, Local Businesses                |
| Workforce Capacity and Capability             | HR Departments, Training Coordinators               | Senior Management                             | Employees, Professional Associations                               | Entire Workforce                           |
| System-wide Governance and Leadership         | Governance Bodies, Policy Makers                    | Board of Directors                            | Healthcare Leaders, Regulatory Agencies                            | All Organizational Members                 |
| Digital Solutions                             | IT Departments, Digital Health Specialists          | CIO (Chief Information Officer)               | End-users (Healthcare Providers, Patients)                         | All Staff and Patients                     |
| Aligned Payment Systems                       | Finance Departments, Billing Teams                  | CFO (Chief Financial Officer)                 | Insurance Companies, Policy Makers                                 | Healthcare Providers, Patients             |
| Transparency of Progress, Results, and Impact | Data Analysts, Reporting Teams                      | Quality Assurance Departments                 | Healthcare Providers, Patient Representatives                      | All Stakeholders, Public                   |

**Fig 1. Nine Pillars of Integrated Care mapped to RACI matrix categories.**

<https://doi.org/10.1371/journal.pone.0325270.g001>

PRISMA extension for scoping reviews (PRISMA-ScR) guidelines to ensure transparency and rigour [52] (see S1 Fig). We will systematically search multiple databases, including Medline, PubMed, Embase, CINAHL, and PsycINFO, using a combination of relevant keywords and Medical Subject Headings (MeSH) terms. The search strategy will be designed to capture articles, reports, guidelines, and policy documents published within the last decade (from 2008 onwards) (See S2 Fig). We will include studies and documents on initiatives between community pharmacists and FP and NP-led practices and teams. Articles will be excluded if they do not meet these criteria or are not available in English. The screening will occur at two levels (level 1- title and abstract; level 2- full text) through the engagement of a graduate student and member of the research team independently.



Information will be extracted from the selected studies, including governance structures, composition of stakeholders, processes, challenges, enablers, and outcomes. Using elements of the RACI framework, we will analyze the literature to identify: *Who is Responsible? Who is Accountable? Who needs to be Consulted for expert insights? Who should be informed about the progress and findings?* The Nine Pillars of Integrated Care will be used as a framework to evaluate and categorize the presence or absence of the nine key elements of initiatives between community pharmacy and FP and NP-led practices and teams [46]. We will also examine barriers, facilitators, and lessons learned [53,54]. The review will examine the outcomes achieved by programs or innovations in relation to the quintuple aim (i.e., improving population health, enhancing patient experience, reducing costs, supporting care team well-being, and advancing health equity) [55], such as improvements in patient health outcomes, healthcare quality, access to services, and cost-effectiveness.. Data will be systematically organized and summarized in an EndNote database [56]. The quality of included studies will be assessed using appropriate appraisal tools (e.g., the Cochrane Risk of Bias tool for intervention studies [57] and the Joanna Briggs Institute Critical Appraisal Checklist for other study types [58]). This assessment guides evidence weighting and model selection. Besides academic sources, we will target grey literature in Australia, New Zealand, and the United Kingdom (UK), seeking unpublished reports, policies, and guidelines to uncover nuanced insights from established governance models. Examining literature from Australia, New Zealand, and the UK on integrated models is justified due to the shared similarities in their healthcare systems, including integrated PC models and patient responsibilities of pharmacy practice [59]. These countries also serve as leading examples in fostering integrated approaches between FP and NP practices and pharmacies, offering diverse perspectives and best practices applicable to global healthcare settings. This approach enriches our analysis with real-world examples and innovative strategies. After reviewing the literature, we will reach out to leaders of these innovations in the respective countries; if not found, we will proceed to interview Canadian stakeholders.

## Phase 2: Key informant interviews

We will utilize a qualitative descriptive approach [60] to: (a) exchange knowledge about current and desired strategies for a governance model that facilitates integration between community pharmacists and FPs and NPs; (b) identify key priorities to meet the healthcare needs of Ontarians through an integrated PC model; (c) co-create policy and governance components and priorities (e.g., contracts, accountabilities, laws and responsibilities) aligned with the RACI and The Nine Pillars of Integrated Care to support a comprehensive governance model for integrated PC service delivery that includes community pharmacy in Ontario; and (d) identify future lines of research inquiry to support practice and policy to support integrated models of PC within the context of the Ontario health care system. Qualitative descriptive approaches are beneficial when recommendations related to policy and service are the product of the research [60]. This approach leads to more in-depth and rich data than consultative exercises because it engages stakeholders in qualitative descriptive exploration, fostering nuanced understanding and comprehensive insights into the complexities of integrated PC governance. This is crucial to ensure that policy and practice decisions are informed by a deep understanding of stakeholder perspectives, enabling the development of effective, sustainable, and patient-centered healthcare strategies for Ontarians.

We will engage key informants from FPs, NPs, community pharmacists, policymakers, and others impacted by identified innovations. In the absence of such findings, consultations with professional associations, policymakers, and healthcare leaders will guide informing a future governance model. Healthcare leaders, within this context, encompass executives, administrators, managers, or individuals holding influential roles and involved in guiding strategic decisions and policy implementations of the identified innovation. We will use a purposive and snowball sampling strategy to ensure diverse representation of groups. These interviewees are likely to possess extensive expertise and firsthand experience in the healthcare landscape, enabling them to provide valuable insights and perspectives crucial for informing and collaboratively developing governance models tailored to the needs of different communities. To ensure an equitable balance of perspectives, our purposive sampling strategy will oversample participants from groups that may have less formal

decision-making power, such as community pharmacists and patients. This approach helps mitigate the risk of dominant voices—such as physicians or healthcare executives—overshadowing others in analyses [61]. We will aim to interview at least 30 key informants or until data saturation is achieved, which is in line with recommendations for qualitative research [62]. We anticipate that 30 interviews will allow for data saturation, although more or fewer interviews may be needed [63]. The interviews will be scheduled based on the convenience of participants. We will use semi-structured interview guides tailored to the role and perspective of each informant group. Tailored semi-structured interview guides will explore the various elements of integration, governance, roles, contractual aspects, and accountabilities, gathering insights for governance design. During our interviews, we will remain mindful of the potential implications of equity, diversity, inclusion, accessibility and anti-racism for integrated governance and be open to discussing how these factors may influence the development and implementation of our proposed models. This approach ensures that our governance strategies are inclusive and responsive to the diverse needs of all stakeholders within the context of the Ontario healthcare system.

### Data analysis

We will use a modified codebook thematic analysis aided by NVivo software. This method, guided by Braun and Clarke's stages [64], involves familiarizing oneself with data (reviewing the transcripts and/or audio files numerous times), coding, and creating a comprehensive coding scheme. First, we will immerse ourselves in the data by repeatedly reviewing the transcripts and/or audio files to gain a deep understanding of the content. This familiarization process is crucial for developing an intuitive grasp of the data's nuances. We will undertake both inductive and deductive coding to develop a detailed coding scheme. Inductive coding involves identifying patterns and themes directly from the data without any pre-conceived categories, allowing the data to guide the formation of codes based on observed content. In contrast, deductive coding uses existing theories or frameworks, such as the RACI framework and the Nine Pillars of Integration, to structure our coding. This ensures our analysis is anchored in established concepts. Creating a comprehensive coding scheme involves several steps. We will review and refine the initial codes, compare these codes against the RACI and the Nine Pillars of Integrated Care framework, and incorporate feedback from the research team to ensure the scheme covers all relevant aspects of the data. This collaborative process ensures a robust and exhaustive coding scheme.

As we progress, we will group similar codes into broader categories to identify key themes and sub-themes. This synthesis and categorization process helps pinpoint major patterns within the data, facilitating a clearer understanding of the overarching themes. During the thematic analysis phase, we will focus on identifying innovative practices, challenges, and outcomes of integrated models. Innovative practices highlight new and effective methods for integration, while challenges refer to common difficulties and obstacles faced. Outcomes encompass the results and impacts of these integrated initiatives. We will compare our findings with existing literature to highlight similarities between our themes and previously identified initiatives. This comparative analysis helps identify elements of governance models that can be applied and refines our themes to ensure they are comprehensive and well-supported by both the data and existing research. The titles for our themes will be crafted to reflect insights directly derived from the data, concepts from the RACI framework [44] and the Nine Pillars of Integrated Care [46], and findings from the literature review. This ensures the themes are both data-driven and theoretically grounded. NVivo software will assist us by facilitating the coding process, organizing and managing the data effectively, and supporting the synthesis and analysis of our qualitative data. By following this structured approach, we aim to provide a detailed understanding of the roles and responsibilities within best practice integrated care innovations involving PC practices and community pharmacies.

The investigative team will review this list of codes, compare it to the RACI framework and the Nine Pillars of Integrated Care framework and provide feedback to create an exhaustive coding scheme that we will apply to all data. The coding process will involve multiple coders, each working individually initially. Subsequently, they will convene to compare and collaborate on their respective codes. As we synthesize the data, we will combine similar codes into larger categories [64]. While conducting thematic analysis, we will draw upon the innovative practices, challenges, and outcomes observed in

integrated programs and innovations found in the literature. Comparative analysis with literature-driven initiatives will help identify applicable governance model elements, shaping the data-derived themes. Titles will be crafted to reflect both the data-driven insights, the RACI framework, the Nine Pillars of Integration and the ideas identified in the literature. We will also draw on insights from governance [65] and health policy [66] literatures to examine power dynamics within integrated models. This perspective will allow us to ask more focused questions of the data, such as: Whose interests are being prioritized in decision-making? How is authority distributed among pharmacists, FPs and NPs stakeholders? What are potential sources of conflict and mechanisms for resolution? Given the potential for scope of practice reform to reshape professional boundaries and challenge existing hierarchies, we will attend closely to the form and structure of relationships enabled within this emergent governance system.

## Discussion

Community pharmacists play a crucial role in healthcare systems worldwide, offering diverse services and often serving as the most accessible healthcare providers within communities. The recent expansion of pharmacists' scope of practice in Ontario, granting them prescribing authority for common ailments, reflects a transformative shift in PC in the Ontario health care system [9,67,68]. This expansion aligns with broader trends seen in other Canadian provinces and countries, indicating a global recognition of the value pharmacists bring to healthcare delivery. Governance mechanisms are essential for defining roles, responsibilities, and accountability among stakeholders, ensuring alignment with legal and ethical standards, and optimizing resource utilization.

This protocol outlines an exploratory study aimed at gathering foundational knowledge for developing an effective governance structure supporting integrated service delivery within the Ontario healthcare system. By conducting a comprehensive literature review and engaging key stakeholders through interviews, the study seeks to identify best practices, challenges, and priorities for governance. The use of a multi-methods approach, informed by the RACI framework and the Nine Pillars of Integration, ensures a holistic understanding of governance needs and opportunities, guiding the development of tailored governance strategies.

Overall, the findings from this study have the potential to inform policy and practice, facilitating the establishment of governance models that promote seamless integration among community pharmacists and FPs and NPs. A key expected outcome is improved integrated care, or the embedding of pharmacy and FP and NP services within a unified delivery system. This is expected to yield numerous downstream benefits, including improved coordination between providers (as demonstrated by such indicators as the development of joint care plans and increased interdisciplinary meetings) [69], enhanced patient outcomes (e.g., management of chronic conditions, adherence to medication regimens, reduced medication errors, fewer hospitalizations) [70], improved workforce conditions and service accessibility (e.g., alleviating physician workload by assigning pharmacists basic clinical responsibilities) [71], and greater system efficiency and cost-effectiveness (e.g., by reducing duplication of services and streamlining medication management processes) [72].

Critically, integrated care through shared governance between community pharmacists and FPs and NPs can also be expected to foster a more equitable distribution of power and improve health, economic, and humanistic outcomes across healthcare sectors, providers, and patients. Community pharmacists, whose role has traditionally been restricted to dispensing medications, may gain greater autonomy and influence in clinical decision-making through collaboration [73,74]. By assigning pharmacists basic clinical responsibilities, FP and NP workloads can be alleviated, supporting provider morale and retention of the workforce [71,75]. At the patient level, this can translate to increased attachment and service accessibility, particularly for historically underserved populations, including racialized communities, gender and sexual minorities, recent immigrants, individuals with low income, and those in rural areas [76]. Nevertheless, it is imperative to remain mindful of potential unintended consequences and consider strategies to mitigate risks. For example, the shifting of service delivery responsibilities to private, for-profit entities may introduce perverse incentives that undermine service quality and accessibility, which could disproportionately impact equity-deserving groups [77].



To the best of our knowledge, this study is the first of its kind. Integrated governance models hold the promise of becoming foundational elements in healthcare policy and practice. Ultimately, these models can enhance patient-centred care delivery, improve healthcare outcomes, and contribute to the overarching goal of enhancing the quality and accessibility of healthcare services.

## Conclusion

The outlined protocol signifies a pivotal advancement in fostering governance within the healthcare system to enhance patient-centred care. Community pharmacists have expanded roles following recent legislative changes, necessitating effective governance structures to ensure seamless integration with FPs and NPs. Through a comprehensive approach informed by the RACI framework and the Nine Pillars of Integration, this study seeks to gather foundational knowledge for developing such governance models. By conducting a thorough literature review and engaging stakeholders via interviews, the study aims to identify best practices, challenges, and priorities for a governance model that enables integration. These efforts not only pave the way for tailored strategies aligned with legal and ethical standards but also hold the potential to transform healthcare policy and practice. The envisioned governance models aim to enhance patient-centred care delivery, improve healthcare outcomes, and contribute to the overall enhancement of healthcare services in Ontario. The proposed model also has the potential to empower frontline providers, particularly community pharmacists, by expanding their role in decision-making and care coordination. By fostering clearer accountability and collaboration, the model could enable pharmacists to contribute more actively to patient care, ensuring that diverse healthcare providers have a voice in shaping healthcare delivery. Moreover, by facilitating greater collaboration across professions, the model can help break down disciplinary silos, fostering a more cohesive and team-based approach to primary care. This pioneering endeavour lays the groundwork for innovative governance approaches that could serve as a blueprint for integrated healthcare systems globally, positioning Ontario at the forefront of healthcare innovation and excellence.

## Supporting information

### **S1 Appendix. PRISMA-P Checklist.**

(DOCX)

### **S2 Appendix. Ovid Medline Search Strategy.**

(DOCX)

## Acknowledgments

We thank Eric Fillice for research assistance.

## Author contributions

**Conceptualization:** Monica Aggarwal, Lisa Dolovich.

**Funding acquisition:** Monica Aggarwal.

**Investigation:** Monica Aggarwal.

**Methodology:** Monica Aggarwal, Lisa Dolovich, Kristina M Kokorelias.

**Project administration:** Monica Aggarwal.

**Resources:** Monica Aggarwal.

**Writing – original draft:** Monica Aggarwal, Kristina M Kokorelias.

**Writing – review & editing:** Monica Aggarwal, Lisa Dolovich, Yazid Al Hamarneh, Reed Beall, Ross Upshur.

## References

- Aggarwal M, Hutchison BG. Toward a primary care strategy for Canada. Canadian foundation for healthcare improvement; 2013.
- Eickhoff C, Griese-Mammen N, Mueller U, Said A, Schulz M. Primary healthcare policy and vision for community pharmacy and pharmacists in Germany. *Pharm Pract*. 2021;19(1):2248.
- Hedima EW, Adeyemi MS, Ikunaiye NY. Community Pharmacists: On the frontline of health service against COVID-19 in LMICs. *Res Social Adm Pharm*. 2021;17(1):1964–6. <https://doi.org/10.1016/j.sapharm.2020.04.013> PMID: 32317154
- Brownstein JN, Hirsch GR, Rosenthal EL, Rush CH. Community health workers “101” for primary care providers and other stakeholders in health care systems. *J Ambul Care Manage*. 2011;34(3):210–20. <https://doi.org/10.1097/JAC.0b013e31821c645d> PMID: 21673520
- Valliant SN, Burbage SC, Pathak S, Urick BY. Pharmacists as accessible health care providers: quantifying the opportunity. *J Manag Care Spec Pharm*. 2022;28(1):85–90. <https://doi.org/10.18553/jmcp.2022.28.1.85> PMID: 34949110
- Schindel TJ, Yuksel N, Breault R, Daniels J, Varnhagen S, Hughes CA. Perceptions of pharmacists' roles in the era of expanding scopes of practice. *Res Social Adm Pharm*. 2017;13(1):148–61. <https://doi.org/10.1016/j.sapharm.2016.02.007> PMID: 27061142
- Khaira M, Mathers A, Benny Gerard N, Dolovich L. The evolving role and impact of integrating pharmacists into primary care teams: experience from Ontario, Canada. *Pharm Basel Switz*. 2020;8(4):234.
- Ontario College of Pharmacists. Ontario pharmacists now authorized to prescribe for minor ailments [Internet]. 2023. Available from: <https://www.ocpinfo.com/ontario-pharmacists-now-authorized-to-prescribe-for-minor-ailments/>
- The Canadian Press. Ontario government expands list of conditions pharmacists can treat [Internet]. 2023. Available from: <https://www.cbc.ca/news/canada/toronto/ontario-pharmacies-expands-prescriptions-1.6983936>
- Tannenbaum C, Tsuyuki RT. The expanding scope of pharmacists' practice: implications for physicians. *CMAJ*. 2013;185(14):1228–32. <https://doi.org/10.1503/cmaj.121990> PMID: 23959280
- Manolakis PG, Skelton JB. Pharmacists' contributions to primary care in the United States collaborating to address unmet patient care needs: the emerging role for pharmacists to address the shortage of primary care providers. *Am J Pharm Educ*. 2010;74(10):S7.
- Mossialos E, Courtin E, Naci H, Benrimoj S, Bouvy M, Farris K, et al. From “retailers” to health care providers: Transforming the role of community pharmacists in chronic disease management. *Health Policy*. 2015;119(5):628–39. <https://doi.org/10.1016/j.healthpol.2015.02.007> PMID: 25747809
- Rawlinson C, Carron T, Cohidon C, Arditi C, Hong QN, Pluye P, et al. An Overview of Reviews on Interprofessional Collaboration in Primary Care: Barriers and Facilitators. *Int J Integr Care*. 2021;21(2):32. <https://doi.org/10.5334/ijic.5589> PMID: 34220396
- Scott MA, Hitch B, Ray L, Colvin G. Integration of pharmacists into a patient-centered medical home. *J Am Pharm Assoc* (2003). 2011;51(2):161–6. <https://doi.org/10.1331/JAPhA.2011.10185> PMID: 21382805
- Ndateba I, Wong ST, Beaumier J, Burge F, Martin-Misener R, Hogg W, et al. Primary care practice characteristics associated with team functioning in primary care settings in Canada: A practice-based cross-sectional survey. *J Interprof Care*. 2023;37(3):352–61.
- Makowsky MJ, Schindel TJ, Rosenthal M, Campbell K, Tsuyuki RT, Madill HM. Collaboration between pharmacists, physicians and nurse practitioners: A qualitative investigation of working relationships in the inpatient medical setting. *J Interprof Care*. 2009;23(2):169–84.
- Speed S, Schneider N, Stutzman SE, Olson DM, Higbee A. Feasibility and efficacy of a nurse practitioner-and pharmacist-led hypertension clinic. *J Am Assoc Nurse Pract*. 2022;34(9):1045–9. <https://doi.org/10.1097/JXX.0000000000000765> PMID: 36044343
- Hazen ACM, de Bont AA, Boelman L, Zwart DLM, de Gier JJ, de Wit NJ, et al. The degree of integration of non-dispensing pharmacists in primary care practice and the impact on health outcomes: A systematic review. *Res Social Adm Pharm*. 2018;14(3):228–40. <https://doi.org/10.1016/j.sapharm.2017.04.014> PMID: 28506574
- Farrell B, Dolovich L, Austin Z, Connie S. Implementing a mentorship program for pharmacists integrating into family practice: practical experience from the IMPACT project team. *Can Pharm J Rev Pharm Can*. 2010;143(1):28–36.
- Bush J, Langley CA, Wilson KA. The corporatization of community pharmacy: implications for service provision, the public health function, and pharmacy's claims to professional status in the United Kingdom. *Res Social Adm Pharm*. 2009;5(4):305–18. <https://doi.org/10.1016/j.sapharm.2009.01.003> PMID: 19962674
- Jackson H. Shoppers Drug Mart opens 2 pharmacy care clinics in Ontario [Internet]. Global News; 2023. Available from: <https://globalnews.ca/news/9855274/pharmacy-care-clinics-ontario/>
- McGee JE, Love LG, Festervand TA. Competitive advantage and the independent retail pharmacy: the role of distinctive competencies. *J Pharm Mark Manage*. 2000;13(3):31–46.
- Bouldin AS, Bentley JP, Huffman DC, Garner DD. Independent pharmacy: rising to meet the challenge of the future. *J Pharm Mark Manage*. 1996;10(2–3):149–66.
- Bryden-Blom S. Demand high for pharmacy primary care clinic pilot project in Nova Scotia [Internet]. Global News; 2023. Available from: <https://globalnews.ca/news/9479016/demand-high-pharmacy-primary-care-clinic-pilot-project-nova-scotia/>
- Zhang T. The Doctor Dilemma: Improving Primary Care Access in Canada. SSRN Electron J [Internet]. 2024 [cited 2025 Mar 18]; Available from: <https://www.ssrn.com/abstract=4839693>
- Goodwin N. Understanding integrated care. *Int J Integr Care*. 2016;16(4):6.

27. Garner MJ, Birmingham M, Aker P, Moher D, Balon J, Keenan D, et al. Developing integrative primary healthcare delivery: adding a chiropractor to the team. *Explore (NY)*. 2008;4(1):18–24. <https://doi.org/10.1016/j.explore.2007.10.003> PMID: [18194787](#)
28. Boon HS, Mior SA, Barnsley J, Ashbury FD, Haig R. The difference between integration and collaboration in patient care: results from key informant interviews working in multiprofessional health care teams. *J Manipulative Physiol Ther*. 2009;32(9):715–22. <https://doi.org/10.1016/j.jmpt.2009.10.005> PMID: [20004798](#)
29. Brown JB, Mulder C, Clark RE, Belsito L, Thorpe C. It starts with a strong foundation: constructing collaborative interprofessional teams in primary health care. *J Interprof Care*. 2021;35(4):514–20.
30. Nicholson C, Hepworth J, Burriddle L, Marley J, Jackson C. Translating the Elements of Health Governance for Integrated Care from Theory to Practice: A Case Study Approach. *Int J Integr Care*. 2018;18(1):11. <https://doi.org/10.5334/ijic.3106> PMID: [29588645](#)
31. Lewis M, Gelander GP. Governance in health care delivery: raising performance. [Internet]. World Bank; 2009. Available from: <https://documents.worldbank.org/en/publication/documents-reports/documentdetail/598881468161366551/governance-in-health-care-delivery-raising-performance>
32. Koivusalo M, Pereduhoff K. What future for global health governance and the right to health in the era of new generation trade and investment agreements? *Glob Health Gov*. 2018;12(1):116–30.
33. Kringos DS, Boerma WGW, Hutchinson A, Saltman RB, editors. Building primary care in a changing Europe: Case studies [Internet]. Copenhagen (Denmark): European Observatory on Health Systems and Policies; 2015 [cited 2025 Mar 18]. (European Observatory Health Policy Series). Available from: <http://www.ncbi.nlm.nih.gov/books/NBK459010/>
34. Huxham C, Vangen S, Huxham C, Eden C. The Challenge of Collaborative Governance. *Public Manag Int J Res Theory*. 2000;2(3):337–58.
35. Bianchi C, Nasi G, Rivenbark WC. Implementing collaborative governance: models, experiences, and challenges. *Public Manag Rev*. 2021;23(11):1581–9.
36. Lake JD, Rosenberg-Yunger ZRS, Dainty KN, Rolf von den Baumen T, Everall AC, Guilcher SJT. Understanding perceptions of involving community pharmacy within an integrated care model: a qualitative study. *BMC Health Serv Res*. 2020;20(1):396. <https://doi.org/10.1186/s12913-020-05237-y> PMID: [32393239](#)
37. Dolovich L, Pottie K, Kaczorowski J, Farrell B, Austin Z, Rodriguez C, et al. Integrating family medicine and pharmacy to advance primary care therapeutics. *Clin Pharmacol Ther*. 2008;83(6):913–7. <https://doi.org/10.1038/clpt.2008.29> PMID: [18388882](#)
38. Piquer-Martinez C, Urionagüena A, Benrimoj SI, Calvo B, Martinez-Martinez F, Fernandez-Llimos F, et al. Integration of community pharmacy in primary health care: The challenge. *Res Social Adm Pharm*. 2022;18(8):3444–7. <https://doi.org/10.1016/j.sapharm.2021.12.005> PMID: [35016847](#)
39. Munger MA, Sundwall DN, Feehan M. Integrating family medicine and community pharmacy to improve patient access to quality primary care and enhance health outcomes. *Am J Pharm Educ*. 2018;82(4):6572.
40. Jorgenson D, Laubscher T, Lyons B, Palmer R. Integrating pharmacists into primary care teams: barriers and facilitators. *Int J Pharm Pract*. 2014;22(4).
41. Woldeesenbet WG. Collaborative governance: assessing the problem of weak cross-sectoral collaborations for the governance of Addis Ababa rivers. *Applied Water Science*. 2018;8(4):116.
42. Embuldeniya G, Gutberg J, Sibbald SS, Wodchis WP. The beginnings of health system transformation: How Ontario Health Teams are implementing change in the context of uncertainty. *Health Policy*. 2021;125(12):1543–9. <https://doi.org/10.1016/j.healthpol.2021.10.005> PMID: [34702574](#)
43. Ontario Health. Ontario Health Teams. [Internet] 2024. Available from: <https://www.ontariohealth.ca/system-planning/ontario-health-teams>
44. Smith ML, Erwin J, Diaferio S. Role & responsibility charting (RACI). *Project Management Forum*; 2005.
45. Elwyn G, Edwards A, Kinnersley P. Shared decision-making in primary care: the neglected second half of the consultation. *Br J Gen Pract*. 1999;49(443):477–82. PMID: [10562751](#)
46. International Foundation for Integrated Care. The Nine Pillars of Integrated Care [Internet]. Available from: <https://integratedcarefoundation.org/nine-pillars-of-integrated-care>
47. Awowale AA. Decision making in healthcare systems: Roles and responsibilities. University of Maryland, College Park; 2017.
48. Mitton C, Donaldson C. Setting priorities in Canadian regional health authorities: a survey of key decision makers. *Health Policy*. 2002;60(1):39–58. [https://doi.org/10.1016/S0168-8510\(01\)00190-7](https://doi.org/10.1016/S0168-8510(01)00190-7) PMID: [11879944](#)
49. McKie J, Shrimpton B, Hurworth R, Bell C, Richardson J. Who should be involved in health care decision making? A qualitative study. *Health Care Anal*. 2008;16(2):114–26. <https://doi.org/10.1007/s10728-007-0051-y> PMID: [18449805](#)
50. Jamali D, Hallal M, Abdallah H. Corporate governance and corporate social responsibility: evidence from the healthcare sector. *Corp Gov Int J Bus Soc*. 2010;10(5):590–602.
51. Peters MDJ, Marnie C, Tricco AC, Pollock D, Munn Z, Alexander L, et al. Updated methodological guidance for the conduct of scoping reviews. *JBI Evidence Synthesis*. 2020;18(10):2119–26.
52. Tricco AC, Lillie E, Zarin W, O'Brien KK, Colquhoun H, Levac D, et al. PRISMA Extension for Scoping Reviews (PRISMA-ScR): Checklist and Explanation. *Annals of Internal Medicine*. 2018;169(7):467–73.
53. Lee W yeon, Lee S hoon, Jin C, Hyun C taek. Development of the RACI model for processes of the closure phase in construction programs. *Sustainability*. 2021;13(4):1806.

54. Feltus C, Petit M, Dubois E. Strengthening employee's responsibility to enhance governance of IT: COBIT RACI chart case study. In: Proceedings of the first ACM workshop on Information security governance [Internet]. Chicago Illinois USA: ACM; 2009 [cited 2025 Mar 18]. p. 23–32. Available from: <https://dl.acm.org/doi/10.1145/1655168.1655174>
55. Sikka R, Morath JM, Leape L. The Quadruple Aim: care, health, cost and meaning in work. *BMJ Qual Saf*. 2015;24(10):608–10. <https://doi.org/10.1136/bmjqs-2015-004160> PMID: 26038586
56. Bramer WM, Milic J, Mast F. Reviewing retrieved references for inclusion in systematic reviews using EndNote. *J Med Libr Assoc*. 2017;105(1):84–7. <https://doi.org/10.5195/jmla.2017.111> PMID: 28096751
57. Lundh A, Gøtzsche PC. Recommendations by Cochrane Review Groups for assessment of the risk of bias in studies. *BMC Med Res Methodol*. 2008;8:22. <https://doi.org/10.1186/1471-2288-8-22> PMID: 18426565
58. Jun H, Yoon SH, Roh M, Kim S h y e, Lee J, Lee J, et al. Quality assessment and implications for further study of acupotomy: case reports using the case report guidelines and the Joanna Briggs Institute critical appraisal checklist. *J Acupunct Res*. 2021;38(2):122–33.
59. Bardet J-D, Vo T-H, Bedouch P, Allenet B. Physicians and community pharmacists collaboration in primary care: A review of specific models. *Res Social Adm Pharm*. 2015;11(5):602–22. <https://doi.org/10.1016/j.sapharm.2014.12.003> PMID: 25640887
60. Colorafi KJ, Evans B. Qualitative Descriptive Methods in Health Science Research. *HERD Health Environ Res Des J*. 2016;9(4):16–25.
61. Roscoe RD. Designing for diversity: inclusive sampling. *Ergodesign HCI*. 2021;9(1):67.
62. Malterud K, Siersma VD, Guassora AD. Sample Size in Qualitative Interview Studies: Guided by Information Power. *Qual Health Res*. 2016;26(13):1753–60. <https://doi.org/10.1177/1049732315617444> PMID: 26613970
63. Francis JJ, Johnston M, Robertson C, Glidewell L, Entwistle V, Eccles MP, et al. What is an adequate sample size? Operationalising data saturation for theory-based interview studies. *Psychol Health*. 2010;25(10):1229–45. <https://doi.org/10.1080/08870440903194015> PMID: 20204937
64. Braun V, Clarke V. Conceptual and design thinking for thematic analysis. *Qual Psychol*. 2022;9(1):3–26.
65. Klijn EH. Governance networks in the public sector. London New York: Routledge; 2016. p. 1.
66. Buse K, Mays N, Colombini M, Fraser A, Khan M, Walls H. Making health policy. Third edition. Maidenhead: Open University Press, McGraw Hill; 2024.
67. Randall GE, Barr NG, Wakefield PA, Embrett MG. Expanding the Scope of Practice for Pharmacists in Ontario. *Health Reform Obs - Obs Réformes Santé* [Internet]. 2015 Apr 15 [cited 2025 Mar 18];3(1). Available from: <https://mulpress.mcmaster.ca/hro-ors/article/view/1177>
68. Dolovich L. Ontario pharmacists practicing in family health teams and the patient-centered medical home. *Ann Pharmacother*. 2012;46(4):S33–9. <https://doi.org/10.1345/aph.1Q804> PMID: 22499739
69. Moore T, Groppi J, Ourth H, Morreale A, Torrice V. Increasing access to care using clinical pharmacy specialist providers in outpatient mental health: Successful practice integration within the Department of Veterans Affairs. *J Am Pharm Assoc* (2003). 2020;60(5S):S107–12. <https://doi.org/10.1016/j.japh.2020.03.011> PMID: 32280020
70. Richardson TE, O'Reilly CL, Chen TF. A comprehensive review of the impact of clinical pharmacy services on patient outcomes in mental health. *Int J Clin Pharm*. 2014;36(2):222–32. <https://doi.org/10.1007/s11096-013-9900-y> PMID: 24306436
71. Komwong D, Greenfield G, Zaman H, Majeed A, Hayhoe B. Clinical pharmacists in primary care: a safe solution to the workforce crisis?. *J R Soc Med*. 2018;111(4):120–4. <https://doi.org/10.1177/0141076818756618> PMID: 29480743
72. Lankford C, Dura J, Tran A, Lam SW, Naelitz B, Willner M, et al. Effect of clinical pharmacist interventions on cost in an integrated health system specialty pharmacy. *J Manag Care Spec Pharm*. 2021;27(3):379–84. <https://doi.org/10.18553/jmcp.2021.27.3.379> PMID: 33645240
73. Luetsch K, Scuderi C. Experiences of medical dominance in pharmacist-doctor interactions - An elephant in the room?. *Res Social Adm Pharm*. 2020;16(9):1177–82. <https://doi.org/10.1016/j.sapharm.2019.12.013> PMID: 31862212
74. Dosea AS, de Castro Araújo-Neto F, Fonseca FL, Gois Dos Santos L, Pimentel DMM, de Lyra DP Jr. "Reigns but does not govern": A reflection on professionalism and the autonomy of the pharmacist. *Res Social Adm Pharm*. 2023;19(7):1061–72. <https://doi.org/10.1016/j.sapharm.2023.04.119> PMID: 37105775
75. Li K, Frumkin A, Bi WG, Magrill J, Newton C. Biopsy of Canada's family physician shortage. *Fam Med Community Health*. 2023;11(2):e002236. <https://doi.org/10.1136/fmch-2023-002236> PMID: 37173094
76. Saloner B, Wilk AS, Levin J. Community Health Centers and Access to Care Among Underserved Populations: A Synthesis Review. *Med Care Res Rev*. 2020;77(1):3–18. <https://doi.org/10.1177/1077558719848283> PMID: 31079529
77. Goodair B, Reeves A. The effect of health-care privatisation on the quality of care. *Lancet Public Health*. 2024;9(3):e199–206. [https://doi.org/10.1016/S2468-2667\(24\)00003-3](https://doi.org/10.1016/S2468-2667(24)00003-3) PMID: 38429019
